# Supplementary material for: Seroprevalence and Risk Factors of Crimean-Congo Hemorrhagic Fever in Cattle of Smallholder Farmers in Central Malawi
Source: MDPI journal article supplement (doi:10.3390/pathogens10121613), 2021-12-10
Supplement: s1 [file s1]

**Table S1:** Mean optic densities for positive and negative controls and their calculated ratios

| Plate ID                                 | A      | B      | C      | D      | E      | F      | G      | H      | I      | J      |
|------------------------------------------|--------|--------|--------|--------|--------|--------|--------|--------|--------|--------|
| Mean OD <sub>pc</sub>                    | 0.799  | 0.924  | 0.999  | 0.888  | 0.656  | 1.029  | 0.888  | 1.006  | 0.908  | 1.456  |
| Mean OD <sub>nc</sub>                    | 0.046  | 0.052  | 0.045  | 0.046  | 0.052  | 0.0485 | 0.048  | 0.047  | 0.056  | 0.047  |
| OD <sub>pc</sub> /OD <sub>nc</sub> ratio | 17.549 | 17.930 | 22.200 | 19.516 | 12.615 | 21.206 | 18.489 | 21.666 | 16.360 | 30.968 |

NB: Mean OD<sub>pc</sub> were valid when > 0.350 and all OD<sub>pc</sub>/OD<sub>nc</sub> were valid when >3.00  
 OD = optic density; pc = Positive control; nc = Negative control
