# Supplementary material for: Seroprevalence and Risk Factors of Crimean-Congo Hemorrhagic Fever in Cattle of Smallholder Farmers in Central Malawi
Source: MDPI journal article supplement (doi:10.3390/pathogens10121613), 2021-12-10
Supplement: s1 [file s1]

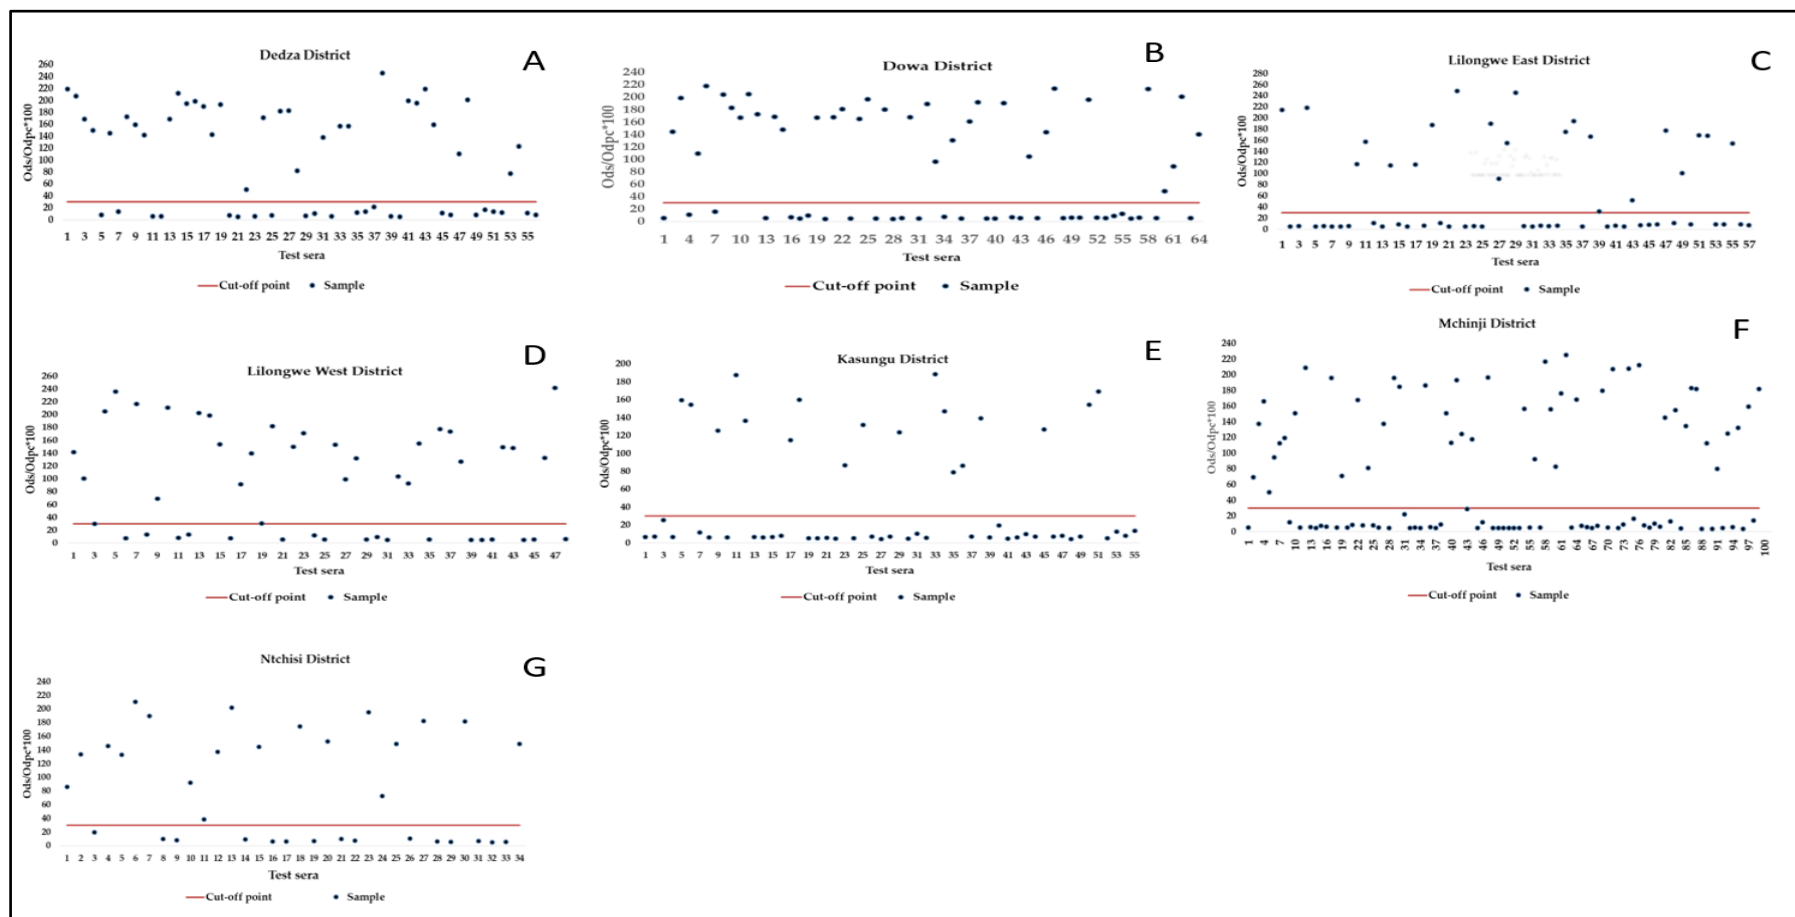

**Figure S1:** Ratios of Optic densities (OD) for sample (S) to Optic density for the positive control (PC) in percentages used to determine positivity/negativity of a serum sample (S/P\*100). A cut-off point of 30% is shown with a red horizontal line. All study districts individual sera data are shown in charts A-G.
